# Supplementary material for: Reproducible growth of Brachypodium in EcoFAB 2.0 reveals that nitrogen form and starvation modulate root exudation
Source: PubMed Central journal article supplement — Sci Adv. 2024 Jan 3;10(1):eadg7888. doi: 10.1126/sciadv.adg7888 (PMC10776018; doi:10.1126/sciadv.adg7888), 2024-01-03
Supplement: sciadv.adg7888_sm.pdf [file sciadv.adg7888_sm.pdf]

Supplementary Materials for  
**Reproducible growth of *Brachypodium* in EcoFAB 2.0 reveals that nitrogen form and starvation modulate root exudation**

Vlastimil Novak *et al.*

Corresponding author: Trent R. Northen, [trnorthen@lbl.gov](mailto:trnorthen@lbl.gov)

*Sci. Adv.* **10**, eadg7888 (2024)  
DOI: 10.1126/sciadv.adg7888

**The PDF file includes:**

Figs. S1 to S7  
Legends for tables S1 to S9  
Legends for files S1 and S2  
References

**Other Supplementary Material for this manuscript includes the following:**

Tables S1 to S9  
Files S1 and S2

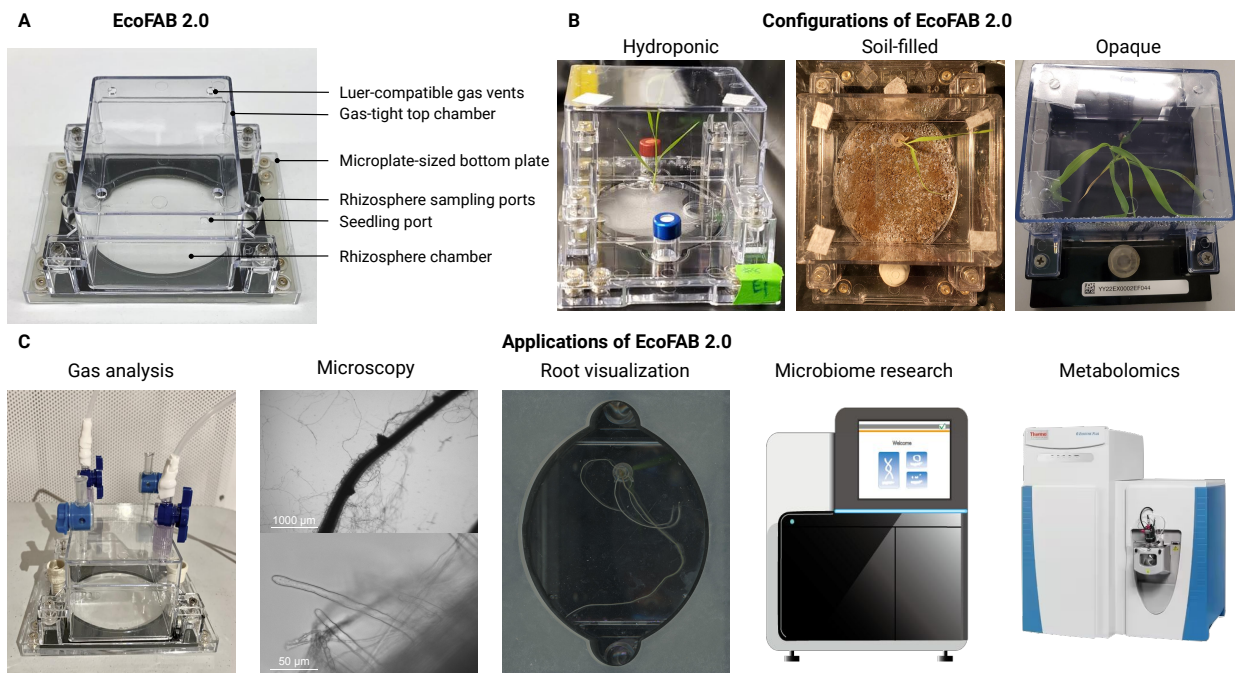

**Fig. S1: EcoFAB 2.0 devices can accommodate a wide diversity of plant research.** (A) Empty EcoFAB 2.0 and its main functional parts. (B) Configurations of EcoFAB 2.0 for *B. distachyon* growth include (from left): EcoFAB 2.0 filled with liquid medium for hydroponic plant growth (used in this study), soil-filled setup, and a version of EcoFAB 2.0 with opaque black root chamber that allows light-sensitive rhizosphere experiments. (C) Examples of possible applications include (from left): gas analysis, microscopy of roots (scale bars represent 1000  $\mu\text{m}$  and 50  $\mu\text{m}$ ), root system visualization, study of microbiomes by 16S sequencing, and metabolomics on growth medium (used in this study).

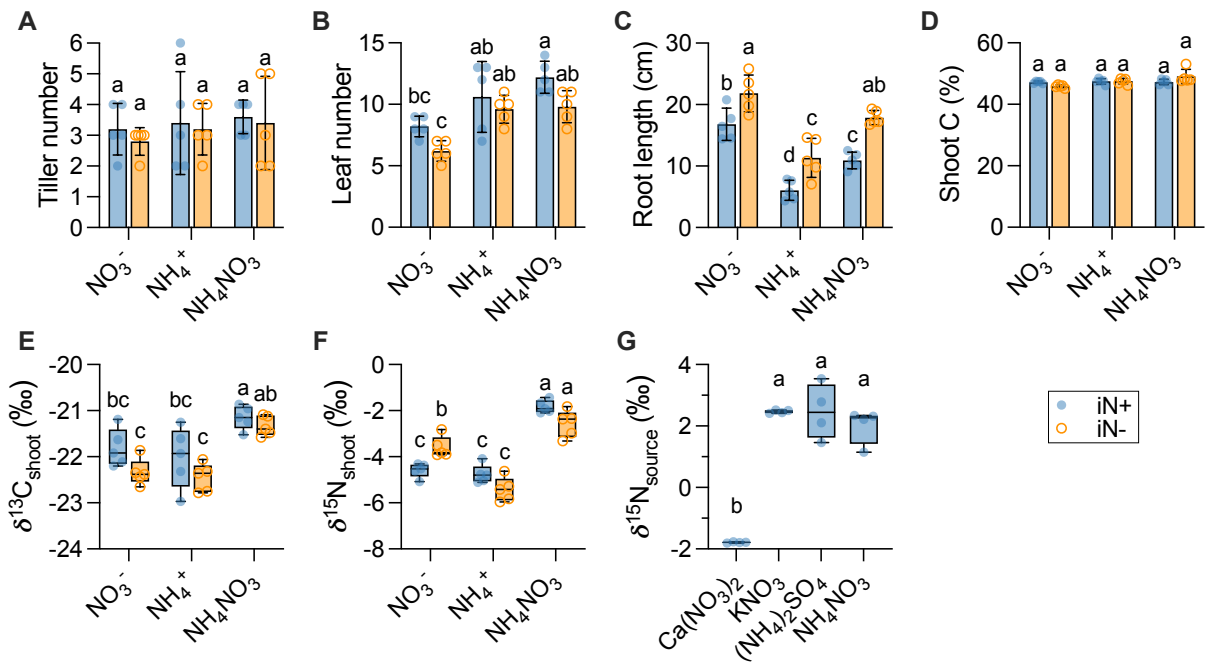

**Fig. S2: Multivariate analysis of plant growth and nutrient dynamics.** (A) total number of tillers (primary and secondary). (B) Total leaf number (fully developed and emerging). (C) Maximum root length. (D) Total carbon in dry shoot weight (% w/w). (E) Carbon stable isotope ratios of shoots. (F) Shoots N stable isotope ratios. (G) N stable isotope ratios of iN sources from the iN+ growth media. Different letters indicate statistically significant differences (two-way ANOVA with post hoc Tukey's HSD test;  $n = 5$ ;  $p \leq 0.05$ ). Bars show mean  $\pm$ SD. Box plots show all points, hinges extend from the 25th to 75th percentiles, the middle line indicates the median, and the whiskers extend to min and max values. The iN+ control treatments are labeled by blue color and the iN- treatments by orange.

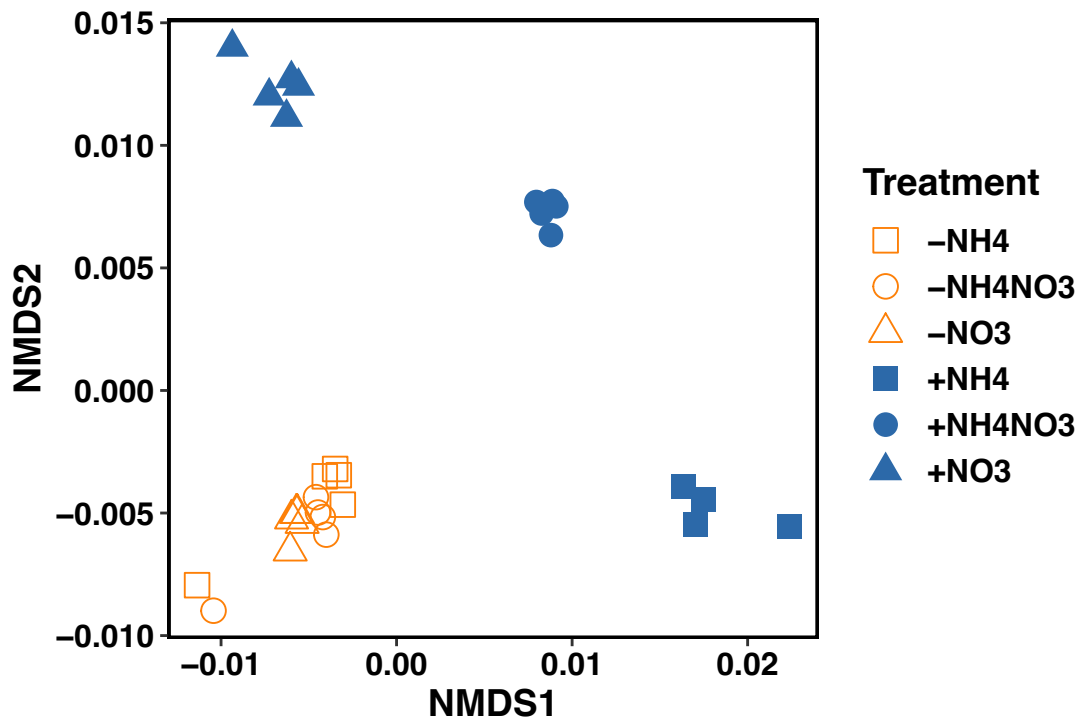

**Fig. S3: NMDS plot for *B. distachyon* root exudate features using raw peak height data (filtered features,  $n = 2065$ ).** Each biological replicate across iN treatments is represented with a symbol. The Blue symbols represent iN+ treatments, while the orange symbols represent plants grown in iN- medium.

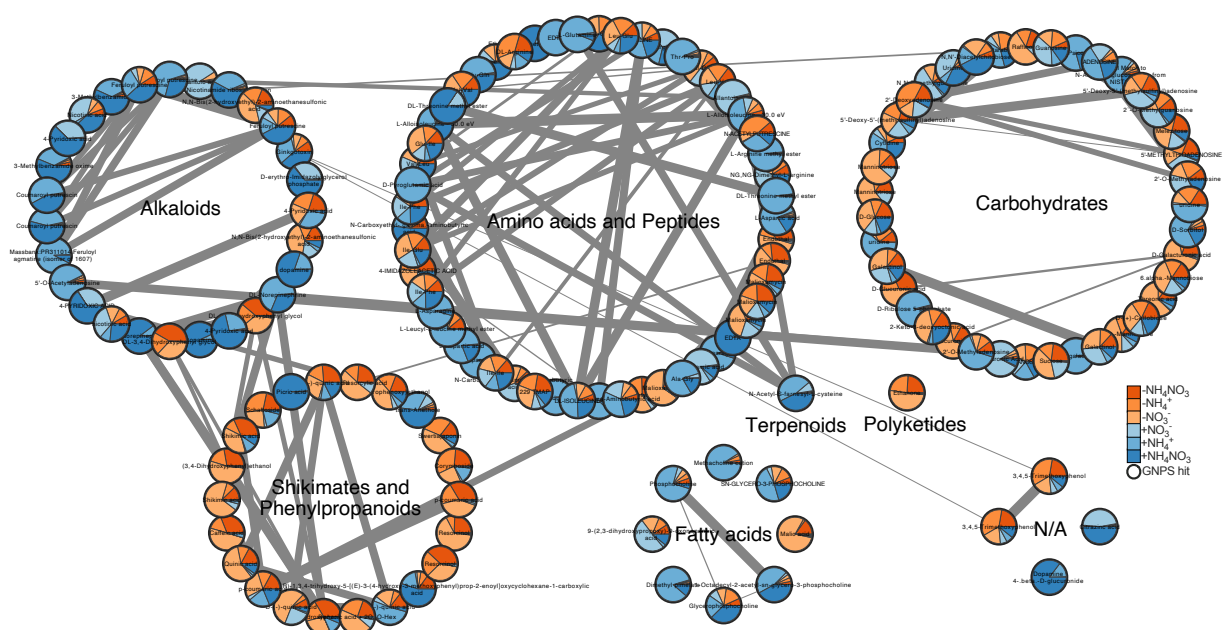

**Fig. S4: Sub-network of grouped annotated features.** The features were grouped into biosynthetic pathways by NPClassifier. Pie charts show relative mean peak heights for individual iN- treatments (shades of orange) and iN+ treatments (shades of blue). The black borders indicate GNPS annotation with MQScore > 0.7 ( $n=155$ ). The network shows merged features from positive and negative polarities of polar metabolite analysis in root exudates of *B. distachyon* Bd21-3 at week 5.

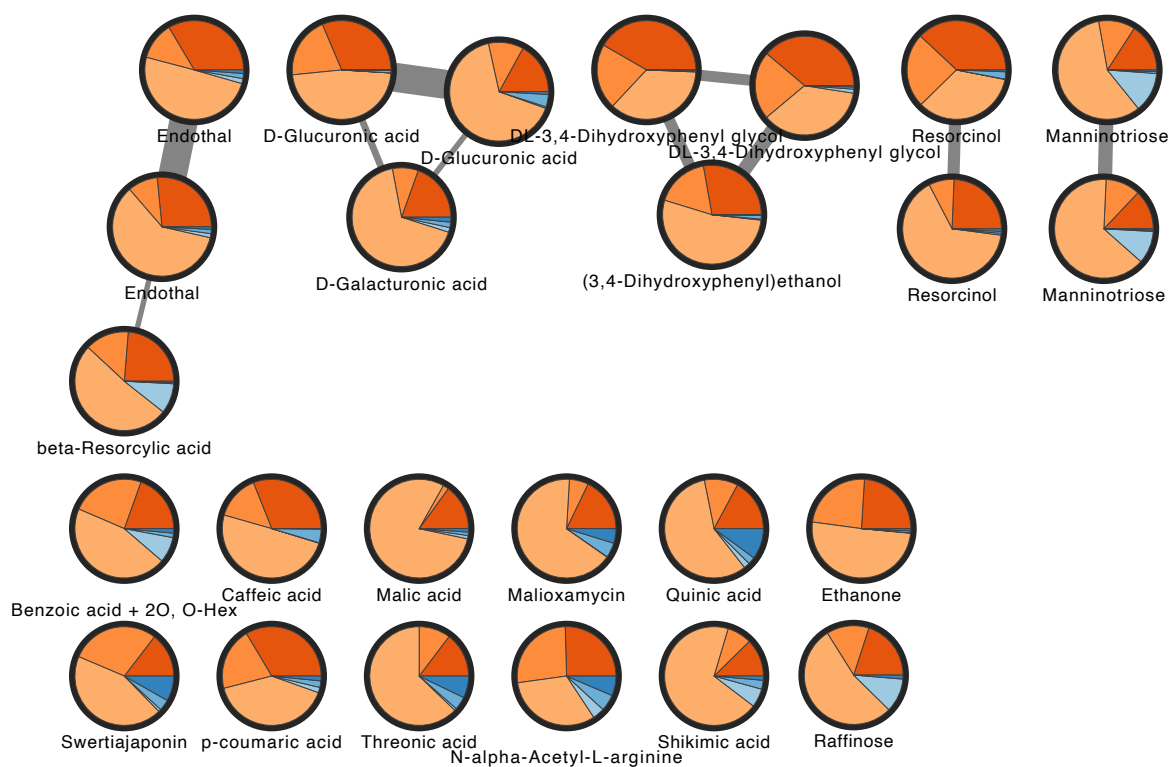

**Fig. S5. Sub-network of annotated features abundant in N-deficient root exudates.** The network shows features significantly increasing  $> 5$ -fold in  $iN^-$  treatments ( $n=15$ ) relative to the  $iN^+$  treatments ( $n=14$ ) (t-test,  $p$ -value  $\leq 0.5$ ). Pie charts show relative mean peak heights for individual  $iN^-$  treatments (shades of orange) and  $iN^+$  treatments (shades of blue). The black borders indicate GNPS annotation with MQScore  $> 0.7$ . The network shows merged features from positive and negative polarities of polar metabolite analysis in root exudates of *B. distachyon* Bd21-3 at week 5.

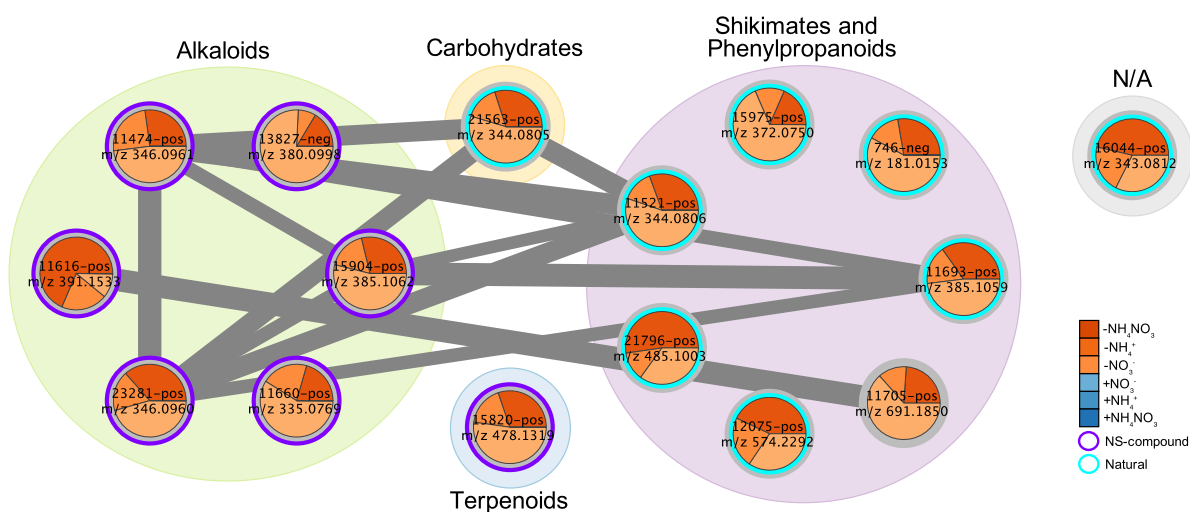

**Fig. S6: GNPS analog search (Analog\_MQScore > 0.7) for subnetwork of top iN-upregulated features.** The features are grouped based on the analog hit classification (biosynthetic pathways by NPClassifier). Pie charts show average peak intensities of iN-treatments (orange gradient) and iN+ treatments (blue gradient). The cyan node border fill (Natural) primarily shows putative shikimate and phenylpropanoid analog compounds that are naturally found in plants (see references in Table S8) and the purple node borders (NS-compound) show putative alkaloid hits analogous to nitrogen-sulfur-compounds such as MES buffer that was in the growth media. Features without a hit to neither NS-compound nor natural plant compound were left in gray.

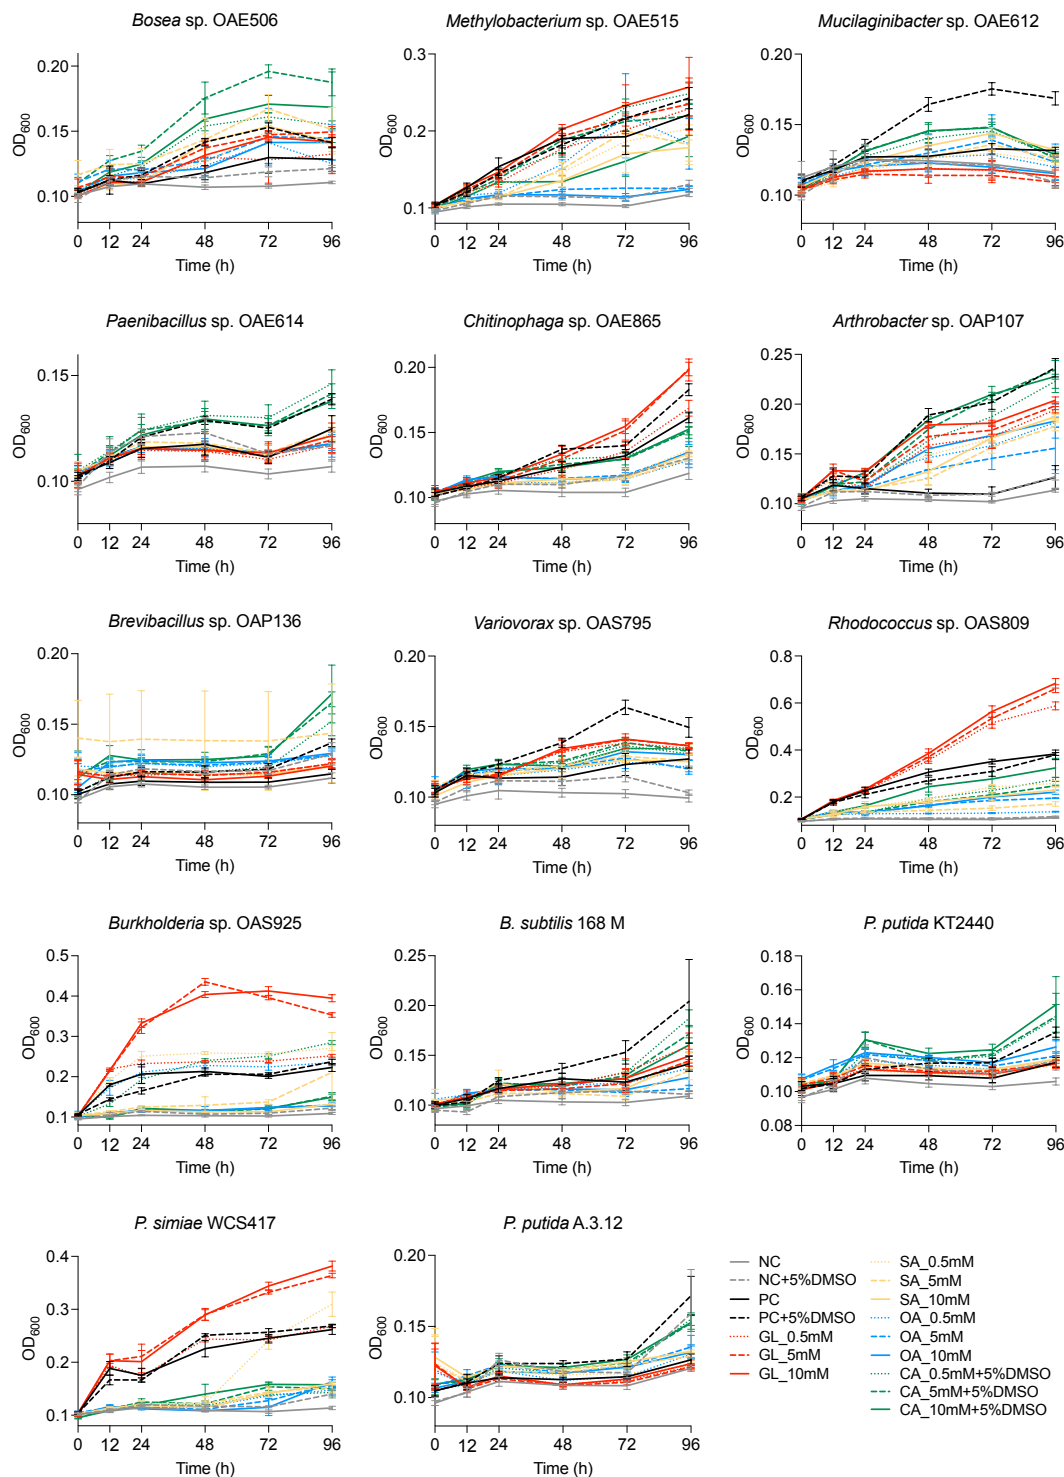

**Fig. S7: Growth curves shown as raw OD<sub>600</sub> for 14 soil bacterial isolates in different carbon sources and concentrations.** Bacteria grew in buffered 0.1x R2A medium supplemented with glucose (GL, red), shikimic acid (SA, yellow), oxalic acid (OA, blue), and *p*-coumaric acid (CA, green). Dotted, dashed, and full lines represent 0.5 mM, 5 mM, and 10 mM concentrations, respectively. Error bars show mean±SD ( $n=6$ ). Negative controls (NC, gray) are uninoculated media, and positive controls (PC, black) are inoculated with the bacteria.



**Table S1: LCMS parameters and Metabolite extraction internal standards mix.**

**Table S2: Molecular network metadata node table.**

**Table S3: All GNPS annotations for features with top annotation MQ score > 0.7.**

**Table S4: Negative and positive polarity alignment of filtered features.**

**Table S5: Statistically significant differences (ANOVA with post hoc Tukey HSD test,  $p \leq 0.01$ ) between peak heights of features in plant exudate samples.**

**Table S6: Selection of differentially produced features and verification against library references.**

**Table S7: Using CANOPUS for determination of class and formula of the top iN-upregulated unknown features.**

**Table S8: GNPS analog search of the top iN-upregulated unknown features - top hits with analog cosine >0.7.**

**Table S9: Coefficient of variation (CV) summary of all data.**

**File S1: Positive mode MZMine2 parameters.**

**File S2: Negative mode MZMine2 parameters.**

## REFERENCES

1. J. M. Lynch, J. M. Whipps, Substrate flow in the rhizosphere. *Plant and Soil* **129**, 1–10 (1990).
2. D. L. Jones, C. Nguyen, R. D. Finlay, Carbon flow in the rhizosphere: Carbon trading at the soil–root interface. *Plant and Soil* **321**, 5–33 (2009).
3. J. Pausch, Y. Kuzyakov, Carbon input by roots into the soil: Quantification of rhizodeposition from root to ecosystem scale. *Glob. Chang. Biol.* **24**, 1–12 (2018).
4. D. V. Badri, J. M. Vivanco, Regulation and function of root exudates. *Plant Cell Environ.* **32**, 666–681 (2009).
5. K. Zhalnina, K. B. Louie, Z. Hao, N. Mansoori, U. N. da Rocha, S. Shi, H. Cho, U. Karaoz, D. Loqué, B. P. Bowen, M. K. Firestone, T. R. Northen, E. L. Brodie, Dynamic root exudate chemistry and microbial substrate preferences drive patterns in rhizosphere microbial community assembly. *Nat. Microbiol.* **3**, 470–480 (2018).
6. Z.-H. Li, Q. Wang, X. Ruan, C.-D. Pan, D.-A. Jiang, Phenolics and plant allelopathy. *Molecules* **15**, 8933–8952 (2010).
7. F. Cheng, Z. Cheng, Research progress on the use of plant allelopathy in agriculture and the physiological and ecological mechanisms of allelopathy. *Front. Plant Sci.* **6**, 1020 (2015).
8. Y. Hu, P. F. Andeer, Q. Zheng, S. M. Kosina, K. J. Jardine, Y. Ding, L. Z. Han, Y. Gao, K. Zengler, B. P. Bowen, J. C. Mortimer, J. P. Vogel, T. R. Northen, Extensive plant use of exometabolites. bioRxiv 2022.07.29.496484 [Preprint] (30 July 2022). <https://doi.org/10.1101/2022.07.29.496484>.
9. D. Coskun, D. T. Britto, W. Shi, H. J. Kronzucker, How plant root exudates shape the nitrogen cycle. *Trends Plant Sci.* **22**, 661–673 (2017).
10. Y. Kuzyakov, E. Blagodatskaya, Microbial hotspots and hot moments in soil: Concept & review. *Soil Biol. Biochem.* **83**, 184–199 (2015).

11. A. B. Daly, A. Jilling, T. M. Bowles, R. W. Buchkowski, S. D. Frey, C. M. Kallenbach, M. Keiluweit, M. Mooshammer, J. P. Schimel, A. S. Grandy, A holistic framework integrating plant-microbe-mineral regulation of soil bioavailable nitrogen. *Biogeochemistry* **154**, 211–229 (2021).
12. M. Keiluweit, J. J. Bougoure, P. S. Nico, J. Pett-Ridge, P. K. Weber, M. Kleber, Mineral protection of soil carbon counteracted by root exudates. *Nat. Clim. Chang.* **5**, 588–595 (2015).
13. A. Jilling, M. Keiluweit, A. R. Contosta, S. Frey, J. Schimel, J. Schnecker, R. G. Smith, L. Tiemann, A. S. Grandy, Minerals in the rhizosphere: Overlooked mediators of soil nitrogen availability to plants and microbes. *Biogeochemistry* **139**, 103–122 (2018).
14. N. Weyens, D. van der Lelie, S. Taghavi, L. Newman, J. Vangronsveld, Exploiting plant-microbe partnerships to improve biomass production and remediation. *Trends Biotechnol.* **27**, 591–598 (2009).
15. J. Zhang, Y.-X. Liu, N. Zhang, B. Hu, T. Jin, H. Xu, Y. Qin, P. Yan, X. Zhang, X. Guo, J. Hui, S. Cao, X. Wang, C. Wang, H. Wang, B. Qu, G. Fan, L. Yuan, R. Garrido-Oter, C. Chu, Y. Bai, NRT1.1B is associated with root microbiota composition and nitrogen use in field-grown rice. *Nat. Biotechnol.* **37**, 676–684 (2019).
16. T. C. de Bang, S. Husted, K. H. Laursen, D. P. Persson, J. K. Schjoerring, The molecular-physiological functions of mineral macronutrients and their consequences for deficiency symptoms in plants. *New Phytol.* **229**, 2446–2469 (2021).
17. L. C. David, T. Girin, E. Fleurisson, E. Phommabouth, A. Mahfoudhi, S. Citerne, P. Berquin, F. Daniel-Vedele, A. Krapp, S. Ferrario-Méry, Developmental and physiological responses of *Brachypodium distachyon* to fluctuating nitrogen availability. *Sci. Rep.* **9**, 3824 (2019).
18. S. Głazowska, L. Baldwin, J. Mravec, C. Bukh, J. U. Fangel, W. G. Willats, J. K. Schjoerring, The source of inorganic nitrogen has distinct effects on cell wall composition in *Brachypodium distachyon*. *J. Exp. Bot.* **70**, 6461–6473 (2019).
19. D. Pacheco-Villalobos, S. M. Díaz-Moreno, A. van der Schuren, T. Tamaki, Y. H. Kang, B. Gujas, O. Novak, N. Jaspert, Z. Li, S. Wolf, C. Oecking, K. Ljung, V. Bulone, C. S. Hardtke, The effects of high steady state auxin levels on root cell elongation in brachypodium. *Plant Cell* **28**, 1009–1024 (2016).

20. K. Ötvös, M. Marconi, A. Vega, J. O'Brien, A. Johnson, R. Abualia, L. Antonielli, J. C. Montesinos, Y. Zhang, S. Tan, C. Cuesta, C. Artner, E. Bouguyon, A. Gojon, J. Friml, R. A. Gutiérrez, K. Wabnik, E. Benková, Modulation of plant root growth by nitrogen source-defined regulation of polar auxin transport. *EMBO J.* **40**, e106862 (2021).
21. V. Römheld, Diagnosis of deficiency and toxicity of nutrients, in *Marschner's Mineral Nutrition of Higher Plants* (Elsevier, 2012), pp. 299–312.
22. N. R. Baker, K. Zhalnina, M. Yuan, D. Herman, J. Ceja-Navarro, J. Sasse, J. S. Jordan, B. P. Bowen, L. Wu, C. Fossum, A. Chew, Y. Fu, M. Saha, J. Zhou, J. Pett-Ridge, T. Northen, M. Firestone, Nutrient and moisture limitation reveal keystone metabolites that link switchgrass rhizosphere metabolome and microbiome dynamics. bioRxiv 2022.06.20.496911 [**Preprint**] (21 June 2022).  
<https://doi.org/10.1101/2022.06.20.496911>.
23. K. Tawarayama, R. Horie, T. Wagatsuma, K. Saito, A. Oikawa, Metabolite profiling of shoot extract, root extract, and root exudate of rice under nitrogen and phosphorus deficiency. *Soil Sci. Plant Nutr.* **64**, 312–322 (2018).
24. L. C. Carvalhais, P. G. Dennis, D. Fedoseyenko, M.-R. Hajirezaei, R. Borriss, N. von Wirén, Root exudation of sugars, amino acids, and organic acids by maize as affected by nitrogen, phosphorus, potassium, and iron deficiency. *J. Plant. Nutr. Soil Sci.* **174**, 3–11 (2011).
25. International Brachypodium Initiative, Genome sequencing and analysis of the model grass *Brachypodium distachyon*. *Nature* **463**, 763–768 (2010).
26. J. Sasse, J. Kant, B. J. Cole, A. P. Klein, B. Arsova, P. Schlaepfer, J. Gao, K. Lewald, K. Zhalnina, S. Kosina, B. P. Bowen, D. Treen, J. Vogel, A. Visel, M. Watt, J. L. Dangl, T. R. Northen, Multilab EcoFAB study shows highly reproducible physiology and depletion of soil metabolites by a model grass. *New Phytol.* **222**, 1149–1160 (2019).
27. J. Gao, J. Sasse, K. M. Lewald, K. Zhalnina, L. T. Cornmesser, T. A. Duncombe, Y. Yoshikuni, J. P. Vogel, M. K. Firestone, T. R. Northen, Ecosystem fabrication (EcoFAB) protocols for the construction of laboratory ecosystems designed to study plant-microbe interactions. *J. Vis. Exp.* **e57170** (2018).

28. M. Wang, J. J. Carver, V. V. Phelan, L. M. Sanchez, N. Garg, Y. Peng, D. D. Nguyen, J. Watrous, C. A. Kapono, T. Luzzatto-Knaan, C. Porto, A. Bouslimani, A. V. Melnik, M. J. Meehan, W.-T. Liu, M. Crüsemann, P. D. Boudreau, E. Esquenazi, M. Sandoval-Calderón, R. D. Kersten, N. Bandeira, Sharing and community curation of mass spectrometry data with Global Natural Products Social Molecular Networking. *Nat. Biotechnol.* **34**, 828–837 (2016).
29. H. W. Kim, M. Wang, C. A. Leber, L.-F. Nothias, R. Reher, K. B. Kang, J. J. J. van der Hooft, P. C. Dorrestein, W. H. Gerwick, G. W. Cottrell, NPCClassifier: A deep neural network-based structural classification tool for natural products. *J. Nat. Prod.* **84**, 2795–2807 (2021).
30. K. Zengler, K. Hofmockel, N. S. Baliga, S. W. Behie, H. C. Bernstein, J. B. Brown, J. R. Dinneny, S. A. Flöge, S. P. Forry, M. Hess, S. A. Jackson, C. Jansson, S. R. Lindemann, J. Pett-Ridge, C. Maranas, O. S. Venturelli, M. D. Wallenstein, E. A. Shank, T. R. Northen, EcoFABs: Advancing microbiome science through standardized fabricated ecosystems. *Nat. Methods* **16**, 567–571 (2019).
31. T. Ranjan, S. Sahni, B. D. Prasad, R. R. Kumar, K. Rajani, V. K. Jha, V. Sharma, M. Kumar, V. Kumar, *Sterilization Technique* (Apple Academic Press, 2017).
32. A. Kawasaki, S. Donn, P. R. Ryan, U. Mathesius, R. Devilla, A. Jones, M. Watt, Microbiome and exudates of the root and rhizosphere of *Brachypodium distachyon*, a model for wheat. *PLOS ONE* **11**, e0164533 (2016).
33. S. Y. Hong, J. H. Park, S. H. Cho, M. S. Yang, C. M. Park, Phenological growth stages of *Brachypodium distachyon*: Codification and description. *Weed Res.* **51**, 612–620 (2011).
34. T. S. Ream, D. P. Woods, C. J. Schwartz, C. P. Sanabria, J. A. Mahoy, E. M. Walters, H. F. Kaeppler, R. M. Amasino, Interaction of photoperiod and vernalization determines flowering time of *Brachypodium distachyon*. *Plant Physiol.* **164**, 694–709 (2014).
35. D. T. Britto, H. J. Kronzucker, NH<sub>4</sub><sup>+</sup> toxicity in higher plants: A critical review. *J. Plant Physiol.* **159**, 567–584 (2002).
36. Y. Liu, N. von Wirén, Ammonium as a signal for physiological and morphological responses in plants. *J. Exp. Bot.* **68**, 2581–2592 (2017).

37. R. Esteban, I. Ariz, C. Cruz, J. F. Moran, Review: Mechanisms of ammonium toxicity and the quest for tolerance. *Plant Sci.* **248**, 92–101 (2016).
38. M. Tegeder, C. Masclaux-Daubresse, Source and sink mechanisms of nitrogen transport and use. *New Phytol.* **217**, 35–53 (2018).
39. D. Reuter, J. B. Robinson, Eds., *Plant Analysis: An Interpretation Manual* (CSIRO Publishing, 1997).
40. W. Kuang, S. Sanow, J. M. Kelm, M. Müller Linow, P. Andeer, D. Kohlheyer, T. Northen, J. P. Vogel, M. Watt, B. Arsova, N-dependent dynamics of root growth and nitrate and ammonium uptake are altered by the bacterium *Herbaspirillum seropedicae* in the cereal model *Brachypodium distachyon*. *J. Exp. Bot.* **73**, 5306–5321 (2022).
41. P. Hinsinger, C. Plassard, C. Tang, B. Jaillard, Origins of root-mediated pH changes in the rhizosphere and their responses to environmental constraints: A review. *Plant and Soil* **248**, 43–59 (2003).
42. Y. Kuzyakov, B. S. Razavi, Rhizosphere size and shape: Temporal dynamics and spatial stationarity. *Soil Biol. Biochem.* **135**, 343–360 (2019).
43. J. Sasse, E. Martinoia, T. Northen, Feed your friends: Do plant exudates shape the root microbiome? *Trends Plant Sci.* **23**, 25–41 (2018).
44. K. Egenolf, S. Verma, J. Schöne, I. Klaiber, J. Arango, G. Cadisch, G. Neumann, F. Rasche, Rhizosphere pH and cation-anion balance determine the exudation of nitrification inhibitor 3-epi-brachialactone suggesting release via secondary transport. *Physiol. Plant.* **172**, 116–123 (2021).
45. S. McLaughlin, K. Zhalnina, S. Kosina, T. R. Northen, J. Sasse, The core metabolome and root exudation dynamics of three phylogenetically distinct plant species. *Nat. Commun.* **14**, 1649 (2023).
46. J. Sasse, S. M. Kosina, M. de Raad, J. S. Jordan, K. Whiting, K. Zhalnina, T. R. Northen, Root morphology and exudate availability are shaped by particle size and chemistry in *Brachypodium distachyon*. *Plant Direct* **4**, e00207 (2020).

47. Q. Liu, T. Gao, W. Liu, Y. Liu, Y. Zhao, Y. Liu, W. Li, K. Ding, F. Ma, C. Li, Functions of dopamine in plants: A review. *Plant Signal. Behav.* **15**, 1827782 (2020).
48. P. Du, B. Yin, S. Zhou, Z. Li, X. Zhang, Y. Cao, R. Han, C. Shi, B. Liang, J. Xu, Melatonin and dopamine mediate the regulation of nitrogen uptake and metabolism at low ammonium levels in *Malus hupehensis*. *Plant Physiol. Biochem.* **171**, 182–190 (2022).
49. N. Francenia Santos-Sánchez, R. Salas-Coronado, B. Hernández-Carlos, C. Villanueva-Cañongo, Shikimic acid pathway in biosynthesis of phenolic compounds, in *Plant Physiological Aspects of Phenolic Compounds* (IntechOpen, 2019), pp. 1–15.
50. M. de Raad, Y. V. Li, J. V. Kuehl, P. F. Andeer, S. M. Kosina, A. Hendrickson, N. R. Saichek, A. N. Golini, L. Z. Han, Y. Wang, B. P. Bowen, A. M. Deutschbauer, A. P. Arkin, R. Chakraborty, T. R. Northen, A defined medium for cultivation and exometabolite profiling of soil bacteria. *Front. Microbiol.* **13**, 855331 (2022).
51. Y. Wang, R. C. Wilhelm, T. L. Swenson, A. Silver, P. F. Andeer, A. Golini, S. M. Kosina, B. P. Bowen, D. H. Buckley, T. R. Northen, Substrate utilization and competitive interactions among soil bacteria vary with life-history strategies. *Front. Microbiol.* **13**, 914472 (2022).
52. V. H. Salvador, R. B. Lima, W. D. dos Santos, A. R. Soares, P. A. F. Böhm, R. Marchiosi, M. de L. L. Ferrarese, O. Ferrarese-Filho, Cinnamic acid increases lignin production and inhibits soybean root growth. *PLOS ONE* **8**, e69105 (2013).
53. N. Yamauchi, Y. Funamoto, M. Shigyo, Peroxidase-mediated chlorophyll degradation in horticultural crops. *Phytochem Rev.* **3**, 221–228 (2004).
54. S. M. Acharya, M. O. Yee, S. Diamond, P. F. Andeer, N. F. Baig, O. T. Aladesanmi, T. R. Northen, J. F. Banfield, R. Chakraborty, Fine scale sampling reveals early differentiation of rhizosphere microbiome from bulk soil in young *Brachypodium* plant roots. *ISME Commun.* **3**, 54 (2023).
55. A. T. Aron, E. C. Gentry, K. L. McPhail, L.-F. Nothias, M. Nothias-Esposito, A. Bouslimani, D. Petras, J. M. Gauglitz, N. Sikora, F. Vargas, J. J. J. van der Hooft, M. Ernst, K. B. Kang, C. M. Aceves, A. M. Caraballo-Rodríguez, I. Koester, K. C. Weldon, S. Bertrand, C. Roullier, K. Sun, P. C. Dorrestein,

- Reproducible molecular networking of untargeted mass spectrometry data using GNPS. *Nat. Protoc.* **15**, 1954–1991 (2020).
56. K. Dührkop, M. Fleischauer, M. Ludwig, A. A. Aksenov, A. V. Melnik, M. Meusel, P. C. Dorrestein, J. Rousu, S. Böcker, SIRIUS 4: A rapid tool for turning tandem mass spectra into metabolite structure information. *Nat. Methods* **16**, 299–302 (2019).
57. K. Dührkop, L.-F. Nothias, M. Fleischauer, R. Reher, M. Ludwig, M. A. Hoffmann, D. Petras, W. H. Gerwick, J. Rousu, P. C. Dorrestein, S. Böcker, Systematic classification of unknown metabolites using high-resolution fragmentation mass spectra. *Nat. Biotechnol.* **39**, 462–471 (2021).
58. R. R. da Silva, P. C. Dorrestein, R. A. Quinn, Illuminating the dark matter in metabolomics. *Proc. Natl. Acad. Sci. U.S.A.* **112**, 12549–12550 (2015).
59. M. P. Pound, A. P. French, J. A. Atkinson, D. M. Wells, M. J. Bennett, T. Pridmore, RootNav: Navigating images of complex root architectures. *Plant Physiol.* **162**, 1802–1814 (2013).
60. Y. Yao, T. Sun, T. Wang, O. Ruebel, T. Northen, B. P. Bowen, Analysis of metabolomics datasets with high-performance computing and metabolite atlases. *Metabolites* **5**, 431–442 (2015).
61. L. W. Sumner, A. Amberg, D. Barrett, M. H. Beale, R. Beger, C. A. Daykin, T. W.-M. Fan, O. Fiehn, R. Goodacre, J. L. Griffin, T. Hankemeier, N. Hardy, J. Harnly, R. Higashi, J. Kopka, A. N. Lane, J. C. Lindon, P. Marriott, A. W. Nicholls, M. D. Reily, M. R. Viant, Proposed minimum reporting standards for chemical analysis chemical analysis working group (CAWG) metabolomics standards initiative (MSI). *Metabolomics* **3**, 211–221 (2007).
62. P. Shannon, A. Markiel, O. Ozier, N. S. Baliga, J. T. Wang, D. Ramage, N. Amin, B. Schwikowski, T. Ideker, Cytoscape: A software environment for integrated models of biomolecular interaction networks. *Genome Res.* **13**, 2498–2504 (2003).
63. L. Molina, Survival of *Pseudomonas putida* KT2440 in soil and in the rhizosphere of plants under greenhouse and environmental conditions. *Soil Biol. Biochem.* **32**, 315–321 (2000).



64. B. J. Cole, M. E. Feltcher, R. J. Waters, K. M. Wetmore, T. S. Mucyn, E. M. Ryan, G. Wang, S. Ul-Hasan, M. McDonald, Y. Yoshikuni, R. R. Malmstrom, A. M. Deutschbauer, J. L. Dangl, A. Visel, Genome-wide identification of bacterial plant colonization genes. *PLoS Biol.* **15**, e2002860 (2017).
65. J. Coker, K. Zhalnina, C. Marotz, D. Thiruppathy, M. Tjuanta, G. D'Elia, R. Hailu, T. Mahosky, M. Rowan, T. R. Northen, K. Zengler, A reproducible and tunable synthetic soil microbial community provides new insights into microbial ecology. *mSystems* **7**, e0095122 (2022).
66. A. S. Liffourrena, G. I. Lucchesi, Alginate-perlite encapsulated *Pseudomonas putida* A (ATCC 12633) cells: Preparation, characterization and potential use as plant inoculants. *J. Biotechnol.* **278**, 28–33 (2018).
67. R. Gallegos-Monterrosa, E. Mhatre, Á. T. Kovács, Specific *Bacillus subtilis* 168 variants form biofilms on nutrient-rich medium. *Microbiology* **162**, 1922–1932 (2016).
68. J. R. Conway, A. Lex, N. Gehlenborg, UpSetR: An R package for the visualization of intersecting sets and their properties. *Bioinformatics* **33**, 2938–2940 (2017).
69. J. Oksanen, F. G. Blanchet, M. Friendly, R. Kindt, P. Legendre, D. McGlinn, P. R. Minchin, R. B. O'Hara, G. L. Simpson, P. Solymos, M. H. H. Stevens, E. Szoecs, H. Wagner. vegan: Community Ecology Package. *R Package Version 2.5–7* (2020). <https://CRAN.R-project.org/package=vegan>.
70. Y. Benjamini, Y. Hochberg, Controlling the false discovery rate: A practical and powerful approach to multiple testing. *J. R. Stat. Soc. B. Methodol.* **57**, 289–300 (1995).
71. C. Pélabon, C. H. Hilde, S. Einum, M. Gamelon, On the use of the coefficient of variation to quantify and compare trait variation. *Evol. Lett.* **4**, 180–188 (2020).
72. J. Xiao, P. Liu, Y. Hu, T. Liu, Y. Guo, P. Sun, J. Zheng, Z. Ren, Y. Wang, Antiviral activities of *Artemisia vulgaris* L. extract against herpes simplex virus. *Chin. Med.* **18**, 21 (2023).
73. J.-F. Goursot, A collaborative work on quantitative HPLC methods for the routine determination of atranol and chloroatranol in moss extracts. *Flavour Fragr. J.* **34**, 28–35 (2019).

74. M. F. Fraga, E. Uriol, L. B. Diego, M. Berdasco, M. Esteller, M. J. Cañal, R. Rodríguez, High-performance capillary electrophoretic method for the quantification of 5-methyl 2'-deoxycytidine in genomic DNA: Application to plant, animal and human cancer tissues. *Electrophoresis* (2002), **23**, 1677, 1681.
75. E. J. Carcache-Blanco, Y.-H. Kang, E. J. Park, B.-N. Su, L. B. S. Kardono, S. Riswan, H. H. S. Fong, J. M. Pezzuto, A. D. Kinghorn, Constituents of the stem bark of *Pongamia pinnata* with the potential to induce quinone reductase. *J. Nat. Prod.* **66**, 1197–1202 (2003).
76. Y. Miyake, M. Hiramitsu, Isolation and extraction of antimicrobial substances against oral bacteria from lemon peel. *J. Food Sci. Technol.* **48**, 635–639 (2011).
77. M. Villarino, P. Sandín-España, P. Melgarejo, A. De Cal, High chlorogenic and neochlorogenic acid levels in immature peaches reduce *Monilinia laxa* infection by interfering with fungal melanin biosynthesis. *J. Agric. Food Chem.* **59**, 3205–3213 (2011).
78. M. Niwa, G.-Q. Liu, H. Tatematsu, Y. Hirata, Chamaechromone, a novel rearranged biflavonoid from *Stellera chamaejasme* L. *Tetrahedron Lett.* **25**, 3735–3738 (1984).
79. M. Topal, H. Gocer, F. Topal, P. Kalin, L. P. Köse, İ. Gülçin, K. C. Çakmak, M. Küçük, L. Durmaz, A. C. Gören, S. H. Alwasel, Antioxidant, antiradical, and anticholinergic properties of cynarin purified from the Illyrian thistle (*Onopordum illyricum* L.). *J. Enzyme Inhib. Med. Chem.* **31**, 266–275 (2016).
